# Supplementary material for: Genome Wide Association Studies Using a New Nonparametric Model Reveal the Genetic Architecture of 17 Agronomic Traits in an Enlarged Maize Association Panel
Source: PLoS Genet. 2014 Sep 11;10(9):e1004573. doi: 10.1371/journal.pgen.1004573 (PMC4161304; doi:10.1371/journal.pgen.1004573)
Supplement: Table S3 — IBD base projection and KNN imputation for validation dataset. (XLSX) [file pgen.1004573.s022.xlsx]

## Sheet: TableS3
Table S3 IBD base projection and KNN imputation for validation data set.
Inbred Name	Heterozygosity	KNN imputation		IBD based projection						Joint IBD based projection and KNN imputation
		Imputation accuracy	Coverage rate	All regions	Accuracy	Regions with more than 150 SNPs and 5 Mb of size	Accuracy for IBD regions with more than 150 SNPs and 5 Mb of size	Coverage rate for IBD regions with more than 150 SNPs and 5 of Mb size	Accuracy for IBD regions with more than 150 SNPs and 5 Mb of size	Accuracy for the missing regions by KNN imputaion	Average accuracy	Total covarage rate
150	0.0216717	0.994255	0.872027	21	0.959483	16	0.96537	0.895835	0.96537	0.985659	0.963942	0.977422
177	0.0084113	0.997654	0.93476	1	0.989106	1	0.989106	1	0.989106	-	0.989106	1
238	0.00819796	0.978341	0.767603	106	0.926756	16	0.979067	0.543062	0.979067	0.962261	0.970004	0.852632
268	0.0483794	0.977346	0.748219	32	0.938124	17	0.951316	0.912701	0.951316	0.946485	0.946523	0.966652
647	0.0149348	0.933446	0.682979	281	0.792642	0	-	0	-	0.933438	0.933403	0.683758
1462	0.281531	0.939429	0.566002	56	0.863379	19	0.877354	0.619377	0.877354	0.927657	0.885007	0.807272
4019	0.0626107	0.969181	0.761213	30	0.909145	17	0.919646	0.840146	0.919646	0.950361	0.915965	0.947619
5213	0.00759784	0.995191	0.904844	32	0.982457	19	0.985042	0.888294	0.985042	0.98981	0.984225	0.99212
5237	0.00827654	0.994667	0.847947	23	0.986476	12	0.987729	0.908016	0.987729	0.981491	0.986157	0.984534
7327	0.00787387	0.978541	0.79236	133	0.914474	11	0.980262	0.47815	0.980262	0.964867	0.972679	0.856391
7381	0.00809678	0.99474	0.903523	33	0.979364	13	0.985066	0.817929	0.985066	0.993188	0.985128	0.974114
8902	0.00736192	0.989819	0.878552	8	0.980684	8	0.980684	1	0.980684	-	0.980684	1
9642	0.0121233	0.995521	0.740757	1	0.987717	1	0.987717	1	0.987717	-	0.987717	1
81162	0.00812026	0.99119	0.841388	35	0.965975	18	0.969498	0.881227	0.969498	0.982434	0.968102	0.980131
526018	0.0074717	0.978112	0.830641	92	0.946659	15	0.973895	0.608878	0.973895	0.962414	0.968609	0.896355
05W002	0.00788988	0.987011	0.88318	99	0.940777	13	0.977791	0.598277	0.977791	0.972148	0.974547	0.923855
05WN230	0.00827352	0.987453	0.869837	88	0.947652	16	0.976494	0.637789	0.976494	0.965808	0.97158	0.931577
07KS4	0.0232505	0.992861	0.862781	53	0.964654	15	0.989295	0.669624	0.989295	0.985092	0.987357	0.937413
18-599	0.00900525	0.997819	0.905894	16	0.980583	10	0.983571	0.958592	0.983571	0.995708	0.982477	0.994062
303WX	0.00854214	0.949165	0.697531	244	0.847845	4	0.980673	0.070094	0.980673	0.941667	0.945178	0.703345
4F1	0.00821328	0.993422	0.87398	58	0.974092	17	0.987616	0.752057	0.987616	0.987157	0.986587	0.938316
7884-4HT	0.0079894	0.955439	0.714702	202	0.869769	2	0.979278	0.0779061	0.979278	0.959248	0.961208	0.732855
835A	0.0553241	0.994596	0.879624	12	0.970897	9	0.970467	0.952958	0.970467	0.995985	0.968649	0.990269
835B	0.00794101	0.987428	0.856583	41	0.95166	9	0.968913	0.868279	0.968913	0.929025	0.962422	0.957677
975-12	0.0081924	0.993338	0.901299	35	0.974024	15	0.986367	0.824771	0.986367	0.983623	0.984828	0.97145
B11	0.00887175	0.943688	0.658493	265	0.820785	0	-	0	-	0.943668	0.943657	0.658493
B110	0.00658794	0.990634	0.884671	55	0.964157	16	0.980524	0.636434	0.980524	0.98281	0.979651	0.940394
B111	0.00735336	0.984171	0.838927	72	0.932288	15	0.94561	0.522629	0.94561	0.982552	0.957848	0.904844
B113	0.0087573	0.964744	0.728994	186	0.874375	5	0.984271	0.114122	0.984271	0.956462	0.960323	0.757171
B114	0.00756945	0.989236	0.818968	64	0.949335	15	0.979708	0.645353	0.979708	0.985613	0.979875	0.906109
B151	0.00792502	0.994887	0.721622	8	0.979273	4	0.983828	0.974475	0.983828	0.966568	0.982058	0.987379
B73	0.00291561	0.998453	0.956345	10	0.986058	10	0.986058	1	0.986058	-	0.986058	1
B77	0.0917677	0.94781	0.662241	196	0.848579	5	0.937388	0.156862	0.937388	0.940275	0.938263	0.689493
BS16	0.00855741	0.975097	0.813256	115	0.929037	8	0.985046	0.594112	0.985046	0.94366	0.970756	0.887741
BY4839	0.00867265	0.987125	0.822739	55	0.960116	19	0.979792	0.653616	0.979792	0.980253	0.978397	0.921744
BY4944	0.00834639	0.977635	0.830968	91	0.947427	14	0.968519	0.437848	0.968519	0.977459	0.971293	0.884998
BY4960	0.00837645	0.985037	0.812217	89	0.952766	13	0.98393	0.504386	0.98393	0.975612	0.979474	0.87696
BY804	0.00783423	0.986217	0.89062	9	0.973188	7	0.973042	0.964417	0.973042	0.981615	0.970793	0.997742
BY807	0.00785271	0.992505	0.88318	10	0.977828	6	0.97838	0.925774	0.97838	0.982582	0.976607	0.981034
BY809	0.00781634	0.994807	0.890134	13	0.984974	7	0.985655	0.93493	0.985655	0.989188	0.984559	0.993385
BY813	0.008569	0.994045	0.857622	23	0.983665	15	0.987444	0.935991	0.987444	0.985652	0.986207	0.993509
BY815	0.00902281	0.994638	0.862657	20	0.985674	13	0.986911	0.965094	0.986911	0.974831	0.985392	0.992414
BY855	0.00888628	0.981872	0.830855	77	0.957327	16	0.973176	0.572786	0.973176	0.977864	0.973129	0.899504
BZN	0.00973588	0.935628	0.687721	285	0.829354	1	0.990108	0.0125535	0.990108	0.933205	0.934142	0.690442
CA47	0.00873637	0.955412	0.708752	165	0.876339	7	0.970547	0.218478	0.970547	0.945666	0.951995	0.745081
CHANG3	0.008404	0.98994	0.724196	15	0.978077	5	0.985732	0.951829	0.985732	0.937331	0.982569	0.989151
CHENG698	0.00791065	0.994097	0.850961	34	0.9838	18	0.986399	0.889751	0.986399	0.983693	0.984662	0.966325
CHUAN48-2	0.0280347	0.991252	0.867387	45	0.976778	19	0.984287	0.765153	0.984287	0.99198	0.984589	0.957056
CI7	0.00743164	0.954563	0.69989	209	0.871564	4	0.968208	0.133516	0.968208	0.948904	0.951906	0.740813
CIMBL1	0.00774067	0.953712	0.75059	188	0.874307	9	0.950951	0.182748	0.950951	0.94615	0.945809	0.781962
CIMBL10	0.00833554	0.986194	0.800149	68	0.945666	12	0.970908	0.624366	0.970908	0.962833	0.966463	0.8682
CIMBL100	0.00892229	0.980011	0.749845	72	0.937052	10	0.978092	0.620923	0.978092	0.946662	0.96755	0.871022
CIMBL101	0.0173741	0.964065	0.70777	141	0.887165	11	0.978034	0.396767	0.978034	0.935993	0.955907	0.787979
CIMBL102	0.0478142	0.969378	0.699913	130	0.90472	13	0.96264	0.388898	0.96264	0.951671	0.954867	0.797632
CIMBL105	0.017291	0.959647	0.705648	195	0.870841	5	0.97705	0.232668	0.97705	0.943509	0.953969	0.748219
CIMBL106	0.0149069	0.981376	0.690453	23	0.958095	8	0.965772	0.855556	0.965772	0.968236	0.962891	0.952834
CIMBL108	0.0110967	0.97866	0.686784	32	0.946557	6	0.960353	0.822321	0.960353	0.948598	0.955406	0.943916
CIMBL109	0.00948669	0.981158	0.684684	20	0.953692	10	0.958318	0.913537	0.958318	0.984575	0.956028	0.972195
CIMBL11	0.00999696	0.991088	0.711202	8	0.980481	2	0.985084	0.961177	0.985084	0.937949	0.982756	0.981215
CIMBL111	0.0148466	0.948539	0.728949	150	0.875594	7	0.934583	0.364988	0.934583	0.930793	0.928885	0.784514
CIMBL113	0.0134315	0.959047	0.674546	177	0.884546	7	0.979513	0.247412	0.979513	0.944179	0.955307	0.744245
CIMBL114	0.00881191	0.98493	0.735903	71	0.954437	12	0.980822	0.709893	0.980822	0.961676	0.975002	0.925966
CIMBL115	0.00761825	0.969663	0.760366	174	0.900317	8	0.98303	0.240153	0.98303	0.95908	0.966054	0.796616
CIMBL116	0.014308	0.973071	0.795171	121	0.915986	9	0.98808	0.492487	0.98808	0.943935	0.969652	0.834107
CIMBL119	0.00763388	0.96373	0.69831	159	0.897992	7	0.978538	0.275104	0.978538	0.957973	0.963757	0.761055
CIMBL12	0.00883678	0.989433	0.715074	5	0.984624	2	0.985077	0.962994	0.985077	0.938023	0.982606	0.985855
CIMBL120	0.0115866	0.985766	0.740667	18	0.970445	14	0.972589	0.98021	0.972589	0.981343	0.970052	0.990686
CIMBL121	0.0198932	0.960174	0.668179	172	0.888069	5	0.983785	0.29171	0.983785	0.946287	0.960456	0.770267
CIMBL122	0.00878062	0.970916	0.668631	138	0.915761	9	0.982444	0.320238	0.982444	0.960624	0.969028	0.774229
CIMBL123	0.00933707	0.946551	0.647441	220	0.85533	6	0.977162	0.209097	0.977162	0.939682	0.950223	0.724185
CIMBL124	0.0424377	0.985381	0.687168	79	0.942843	13	0.966453	0.601359	0.966453	0.97772	0.967797	0.884738
CIMBL125	0.0340482	0.953805	0.684233	148	0.868674	7	0.982913	0.216706	0.982913	0.939627	0.951806	0.731252
CIMBL127	0.02354	0.957027	0.700037	201	0.885269	5	0.980358	0.183922	0.980358	0.952338	0.959136	0.751278
CIMBL129	0.0074257	0.957461	0.69673	191	0.872106	6	0.981788	0.141328	0.981788	0.951918	0.957329	0.725325
CIMBL13	0.00777711	0.989334	0.804507	56	0.964338	20	0.983321	0.701877	0.983321	0.977443	0.980642	0.919294
CIMBL133	0.0116495	0.955513	0.66398	204	0.851672	7	0.981186	0.200415	0.981186	0.945974	0.955155	0.711563
CIMBL137	0.0300965	0.943664	0.61757	176	0.859654	4	0.983341	0.149761	0.983341	0.933554	0.945307	0.648446
CIMBL139	0.0372653	0.947152	0.757623	82	0.909913	13	0.936808	0.547375	0.936808	0.930059	0.930413	0.85918
CIMBL140	0.154288	0.928937	0.500502	24	0.958896	13	0.969297	0.939434	0.969297	0.903028	0.964328	0.971213
CIMBL141	0.0071534	0.990122	0.779388	63	0.964676	17	0.982796	0.741491	0.982796	0.98222	0.981419	0.929138
CIMBL142	0.0101619	0.992664	0.869667	25	0.98564	18	0.98649	0.924995	0.98649	0.961313	0.983817	0.984636
CIMBL143	0.0229692	0.970592	0.735937	120	0.898714	13	0.969827	0.500231	0.969827	0.949423	0.960696	0.815231
CIMBL144	0.00620059	0.976785	0.874736	60	0.944864	17	0.966246	0.570574	0.966246	0.96186	0.962292	0.918752
CIMBL145	0.00855599	0.990211	0.887177	60	0.956503	17	0.979108	0.674366	0.979108	0.971754	0.975435	0.943024
CIMBL147	0.0725503	0.975337	0.7329	52	0.942493	11	0.977467	0.70041	0.977467	0.959167	0.97182	0.884671
CIMBL149	0.03757	0.953794	0.665515	180	0.869509	6	0.932163	0.154932	0.932163	0.949849	0.944291	0.730642
CIMBL15	0.198348	0.89949	0.50442	49	0.748309	17	0.744275	0.727165	0.744275	0.87914	0.741346	0.859259
CIMBL150	0.0220981	0.958618	0.719206	193	0.884264	8	0.96876	0.322699	0.96876	0.942979	0.952718	0.813854
CIMBL151	0.0082971	0.986881	0.679999	23	0.962475	3	0.977918	0.913582	0.977918	0.945243	0.974154	0.96488
CIMBL152	0.0177887	0.953716	0.697226	215	0.862962	9	0.981131	0.182477	0.981131	0.944167	0.952678	0.727357
CIMBL153	0.0133685	0.986033	0.736185	54	0.946253	13	0.967601	0.768314	0.967601	0.96966	0.965233	0.924386
CIMBL156	0.0149705	0.963915	0.712388	180	0.889864	6	0.984801	0.346869	0.984801	0.946259	0.963063	0.797925
CIMBL157	0.00828161	0.948589	0.690261	223	0.861844	7	0.980024	0.177453	0.980024	0.937381	0.947219	0.732053
CIMBL16	0.00878925	0.982768	0.74175	65	0.945857	14	0.980246	0.761789	0.980246	0.948115	0.973358	0.911572
CIMBL17	0.008636	0.979268	0.787121	68	0.940032	12	0.967748	0.745916	0.967748	0.94155	0.960591	0.933315
CIMBL18	0.00746808	0.986126	0.714487	54	0.95709	13	0.973933	0.698129	0.973933	0.972884	0.971727	0.915986
CIMBL19	0.0118286	0.95028	0.639911	175	0.86128	5	0.934092	0.164606	0.934092	0.95334	0.947259	0.711778
CIMBL2	0.00781532	0.992865	0.782561	24	0.963491	15	0.965659	0.915524	0.965659	0.996356	0.96469	0.984726
CIMBL21	0.015223	0.99194	0.718224	56	0.957158	17	0.97087	0.687879	0.97087	0.984367	0.971892	0.90919
CIMBL22	0.0101536	0.982554	0.703966	54	0.957214	13	0.96984	0.719421	0.96984	0.974295	0.968562	0.927445
CIMBL23	0.0431306	0.951854	0.522189	36	0.959969	13	0.978764	0.838871	0.978764	0.953666	0.974851	0.918256
CIMBL25	0.0141404	0.989352	0.698615	35	0.945146	18	0.956377	0.904472	0.956377	0.971447	0.95338	0.966539
CIMBL27	0.27836	0.942524	0.502771	51	0.90087	19	0.926718	0.695691	0.926718	0.948656	0.92469	0.853355
CIMBL28	0.0223103	0.97316	0.674276	36	0.933665	16	0.944801	0.818674	0.944801	0.970977	0.943074	0.932469
CIMBL29	0.0174421	0.982434	0.733171	61	0.941635	14	0.969236	0.660164	0.969236	0.969888	0.966838	0.898466
CIMBL3	0.00787956	0.991453	0.913424	12	0.982355	11	0.983496	0.995947	0.983496	0.991071	0.981933	0.998657
CIMBL32	0.00854474	0.978119	0.758131	115	0.937695	12	0.981842	0.501101	0.981842	0.951258	0.968533	0.855296
CIMBL38	0.00841006	0.977304	0.762918	105	0.922692	9	0.985226	0.50889	0.985226	0.951198	0.971002	0.83221
CIMBL4	0.00780924	0.994166	0.929737	8	0.98546	8	0.98546	1	0.98546	-	0.98546	1
CIMBL40	0.0169004	0.971543	0.760761	139	0.911064	14	0.981191	0.481966	0.981191	0.946362	0.965557	0.836534
CIMBL42	0.0813312	0.939586	0.523329	51	0.925797	19	0.957241	0.76723	0.957241	0.909195	0.94738	0.884625
CIMBL43	0.00849955	0.988544	0.683149	17	0.967239	3	0.977647	0.914621	0.977647	0.96551	0.974876	0.970761
CIMBL46	0.0206036	0.957979	0.69349	173	0.86925	10	0.981345	0.262641	0.981345	0.94439	0.956611	0.747045
CIMBL47	0.0149634	0.981772	0.710988	39	0.909044	15	0.914498	0.816891	0.914498	0.97019	0.913551	0.930674
CIMBL48	0.010858	0.991302	0.78623	23	0.958309	11	0.961442	0.921394	0.961442	0.959489	0.957865	0.980718
CIMBL49	0.0145465	0.980542	0.685519	77	0.929071	8	0.973549	0.629943	0.973549	0.956751	0.966966	0.878021
CIMBL5	0.0086233	0.935486	0.657872	259	0.833486	5	0.918506	0.119687	0.918506	0.932768	0.928182	0.687314
CIMBL50	0.026426	0.993246	0.789955	28	0.9563	15	0.959505	0.858367	0.959505	0.983339	0.958723	0.970558
CIMBL51	0.103054	0.943714	0.5342	44	0.944277	11	0.981241	0.72817	0.981241	0.917298	0.970053	0.865569
CIMBL52	0.0138095	0.978399	0.775189	107	0.946083	9	0.985181	0.639923	0.985181	0.955077	0.976093	0.901401
CIMBL53	0.0115117	0.937665	0.629627	244	0.826441	2	0.980082	0.0470417	0.980082	0.928176	0.931897	0.648548
CIMBL54	0.283801	0.931726	0.509917	68	0.848376	16	0.858901	0.528375	0.858901	0.927816	0.868651	0.761224
CIMBL55	0.0134201	0.949608	0.675788	219	0.838385	5	0.974732	0.163523	0.974732	0.929342	0.939104	0.714295
CIMBL56	0.0269673	0.956259	0.676646	120	0.855432	10	0.844324	0.308994	0.844324	0.956112	0.902312	0.753209
CIMBL58	0.0107707	0.958592	0.712263	166	0.885551	9	0.982823	0.297061	0.982823	0.939248	0.955287	0.754304
CIMBL59	0.0238073	0.958216	0.719624	148	0.881024	8	0.963017	0.347072	0.963017	0.938135	0.948217	0.749472
CIMBL6	0.015111	0.964775	0.721859	204	0.879432	5	0.987362	0.186688	0.987362	0.953146	0.961683	0.734966
CIMBL60	0.012284	0.950913	0.685666	188	0.850092	7	0.98235	0.227058	0.98235	0.934655	0.948431	0.734706
CIMBL62	0.0129575	0.988704	0.690566	37	0.958693	16	0.968119	0.865434	0.968119	0.976723	0.966067	0.952913
CIMBL63	0.0113194	0.992318	0.849132	32	0.973742	18	0.979671	0.899617	0.979671	0.982534	0.978085	0.972737
CIMBL66	0.0079261	0.987832	0.70768	42	0.962012	8	0.983543	0.835529	0.983543	0.94526	0.977892	0.942042
CIMBL68	0.0165598	0.944883	0.656935	246	0.85191	4	0.976929	0.08661	0.976929	0.940962	0.945293	0.682155
CIMBL69	0.0082826	0.985327	0.706517	47	0.96112	5	0.98809	0.798072	0.98809	0.963117	0.983472	0.9359
CIMBL7	0.00843241	0.971833	0.735621	138	0.905262	10	0.98301	0.350843	0.98301	0.957406	0.967965	0.800804
CIMBL70	0.00785474	0.955953	0.676906	213	0.869148	7	0.975774	0.182669	0.975774	0.946678	0.953492	0.713054
CIMBL71	0.00794601	0.981686	0.748727	75	0.946682	13	0.981383	0.711292	0.981383	0.951547	0.973212	0.929409
CIMBL74	0.0122814	0.986263	0.767591	40	0.968887	13	0.980185	0.88195	0.980185	0.953742	0.976002	0.974058
CIMBL75	0.0103581	0.977723	0.73001	75	0.934647	11	0.977577	0.71591	0.977577	0.936233	0.967068	0.90857
CIMBL77	0.0248826	0.982705	0.70803	60	0.937989	11	0.972018	0.69796	0.972018	0.964499	0.96815	0.876204
CIMBL79	0.0570471	0.970885	0.72966	81	0.910839	14	0.945775	0.634357	0.945775	0.935215	0.938863	0.856967
CIMBL81	0.0080861	0.946313	0.66074	231	0.849765	7	0.980585	0.172114	0.980585	0.941192	0.95039	0.70926
CIMBL82	0.0231425	0.936918	0.622131	220	0.82424	3	0.973523	0.0532959	0.973523	0.938082	0.940592	0.635915
CIMBL83	0.00972	0.967845	0.729016	99	0.914113	16	0.958424	0.564241	0.958424	0.939954	0.949079	0.852011
CIMBL84	0.00855171	0.97582	0.797124	20	0.951875	13	0.954188	0.967465	0.954188	0.966646	0.950124	0.989332
CIMBL86	0.00972401	0.957733	0.711338	158	0.880098	13	0.932806	0.333999	0.932806	0.943238	0.935424	0.787009
CIMBL87	0.00856177	0.961377	0.686558	107	0.885416	15	0.925075	0.5828	0.925075	0.942453	0.925589	0.870187
CIMBL88	0.0170501	0.97651	0.71127	106	0.922715	13	0.981778	0.436775	0.981778	0.955559	0.968704	0.808616
CIMBL89	0.00799848	0.973053	0.723462	108	0.914654	15	0.976405	0.491369	0.976405	0.941628	0.960868	0.82564
CIMBL9	0.0110296	0.983046	0.790418	69	0.93388	17	0.963952	0.787302	0.963952	0.941548	0.957864	0.926045
CIMBL90	0.00867189	0.962551	0.705309	166	0.894266	9	0.976804	0.283244	0.976804	0.952665	0.960862	0.76408
CIMBL91	0.00860631	0.991731	0.781499	31	0.971427	12	0.976292	0.861404	0.976292	0.981277	0.974786	0.962678
CIMBL92	0.00975758	0.984635	0.779332	48	0.953229	13	0.969862	0.841693	0.969862	0.956337	0.965771	0.958309
CIMBL93	0.00750794	0.98525	0.725472	63	0.953771	13	0.974713	0.721893	0.974713	0.958812	0.969321	0.925413
CIMBL94	0.0127272	0.957908	0.716869	194	0.872727	5	0.970009	0.205146	0.970009	0.948206	0.953675	0.751595
CIMBL95	0.0178466	0.959944	0.706009	213	0.875368	4	0.978592	0.153453	0.978592	0.9563	0.960856	0.734853
CIMBL96	0.0526246	0.992175	0.846829	22	0.977975	16	0.978918	0.934975	0.978918	0.981348	0.977097	0.982897
CIMBL98	0.0107494	0.994047	0.916675	11	0.985482	9	0.986045	0.990201	0.986045	0.99505	0.984786	0.997968
CIMBL99	0.0100104	0.95934	0.687664	156	0.883485	9	0.97198	0.23811	0.97198	0.948002	0.954416	0.768573
CML114	0.00812962	0.993031	0.729434	3	0.98091	2	0.980739	0.982344	0.980739	0.995458	0.97916	0.99886
CML115	0.00800639	0.951821	0.682641	216	0.862713	4	0.96957	0.0701166	0.96957	0.946311	0.948166	0.701132
CML116	0.00832733	0.965891	0.742936	174	0.891884	8	0.98413	0.260361	0.98413	0.957755	0.96605	0.774241
CML118	0.00817895	0.957072	0.69095	191	0.874973	6	0.98025	0.198914	0.98025	0.941363	0.951598	0.742021
CML121	0.00812422	0.957116	0.670776	210	0.862928	3	0.982414	0.140583	0.982414	0.95071	0.956851	0.710683
CML122	0.00815568	0.992178	0.70418	3	0.983563	2	0.983599	0.989095	0.983599	0.998314	0.982133	0.99685
CML130	0.00798342	0.947889	0.692135	229	0.857633	3	0.982112	0.0965557	0.982112	0.942983	0.946428	0.700207
CML134	0.00851427	0.97933	0.724207	121	0.908491	9	0.984717	0.376717	0.984717	0.968503	0.974517	0.792201
CML139	0.00834537	0.991824	0.706528	3	0.983574	2	0.983553	0.985663	0.983553	0.996219	0.982151	0.999029
CML162	0.00838515	0.971486	0.683804	133	0.914271	13	0.980735	0.41781	0.980735	0.962188	0.971003	0.804992
CML163	0.008955	0.955435	0.681715	197	0.869848	8	0.973103	0.147323	0.973103	0.948206	0.952599	0.709859
CML165	0.0124569	0.959124	0.648864	164	0.891015	10	0.979953	0.261298	0.979953	0.944458	0.9564	0.721848
CML169	0.0122261	0.967841	0.750003	146	0.90157	7	0.982545	0.242535	0.982545	0.953163	0.961511	0.795712
CML170	0.00832032	0.94258	0.65181	255	0.838024	2	0.976995	0.0471094	0.976995	0.939639	0.942162	0.656055
CML171	0.00820591	0.991003	0.663867	1	0.980707	1	0.980707	1	0.980707	-	0.980707	1
CML172	0.00813163	0.989579	0.664285	1	0.980707	1	0.980707	1	0.980707	-	0.980707	1
CML189	0.0186484	0.939369	0.568508	160	0.880652	6	0.979701	0.248597	0.979701	0.931532	0.949089	0.674761
CML191	0.00843043	0.968444	0.710773	176	0.893183	7	0.975208	0.231777	0.975208	0.956803	0.961629	0.755523
CML192	0.00847152	0.956868	0.700918	190	0.88519	6	0.979877	0.198033	0.979877	0.946858	0.954956	0.746142
CML20	0.0171332	0.977245	0.690238	118	0.918019	10	0.96478	0.402908	0.96478	0.965619	0.963304	0.795204
CML290	0.0120407	0.95184	0.67326	201	0.87503	7	0.972315	0.243438	0.972315	0.941802	0.95137	0.735937
CML298	0.00710327	0.958854	0.661914	210	0.869735	6	0.98554	0.118671	0.98554	0.946931	0.953198	0.70286
CML304	0.0107419	0.989447	0.67309	13	0.980368	6	0.983158	0.963886	0.983158	0.967173	0.98117	0.990562
CML31	0.00979697	0.947536	0.663754	209	0.841738	6	0.972582	0.105406	0.972582	0.938518	0.943071	0.677809
CML32	0.00740543	0.949571	0.680056	197	0.859902	5	0.974411	0.172057	0.974411	0.944371	0.951057	0.712421
CML323	0.00823733	0.966977	0.680722	130	0.915456	12	0.976059	0.506903	0.976059	0.94576	0.963002	0.842833
CML324	0.00801672	0.959885	0.668507	172	0.892923	5	0.98454	0.289893	0.98454	0.946079	0.960629	0.764667
CML325	0.00858312	0.957715	0.731082	170	0.884998	7	0.977278	0.189296	0.977278	0.953658	0.958981	0.765559
CML327	0.00865489	0.971132	0.739436	157	0.905013	7	0.963456	0.290694	0.963456	0.959083	0.959443	0.799731
CML338	0.00832906	0.962867	0.690204	149	0.899482	8	0.979042	0.28225	0.979042	0.954203	0.96243	0.758933
CML360	0.0110595	0.945569	0.659746	237	0.829614	3	0.983593	0.0935754	0.983593	0.940593	0.946223	0.680451
CML361	0.0111884	0.955953	0.696131	192	0.863616	7	0.959893	0.156219	0.959893	0.95187	0.95218	0.717163
CML411	0.00807632	0.956154	0.670855	193	0.865976	6	0.967978	0.144896	0.967978	0.94696	0.950435	0.715752
CML415	0.00830167	0.947145	0.689403	232	0.847936	2	0.982321	0.0485319	0.982321	0.94189	0.944549	0.703706
CML422	0.00802428	0.95088	0.720425	203	0.864948	5	0.978173	0.128267	0.978173	0.946809	0.951636	0.737867
CML423	0.00795882	0.960059	0.691108	191	0.883158	6	0.983964	0.246396	0.983964	0.946846	0.958825	0.766564
CML426	0.00912991	0.984793	0.697429	21	0.96681	5	0.97683	0.884806	0.97683	0.964633	0.973765	0.967803
CML431	0.0108343	0.959806	0.694054	156	0.897089	9	0.982539	0.268963	0.982539	0.952182	0.962375	0.761845
CML432	0.00815202	0.971761	0.763561	120	0.913537	16	0.981646	0.465009	0.981646	0.955568	0.969117	0.829218
CML433	0.00870447	0.992527	0.726905	3	0.980605	2	0.980892	0.997279	0.980892	0.993548	0.979085	0.999368
CML454	0.00756205	0.985009	0.674558	34	0.971879	13	0.97621	0.937187	0.97621	0.978812	0.974195	0.985956
CML470	0.0118339	0.981579	0.658482	23	0.964699	5	0.977204	0.899335	0.977204	0.946537	0.973099	0.96532
CML479	0.200126	0.926412	0.512887	71	0.843669	17	0.84152	0.56467	0.84152	0.923149	0.852313	0.795091
CML480	0.00762357	0.96433	0.68325	161	0.892483	12	0.967717	0.374866	0.967717	0.942225	0.952869	0.798219
CML486	0.00800609	0.988159	0.700974	20	0.981328	6	0.984947	0.926169	0.984947	0.971967	0.982903	0.977681
CML493	0.0097589	0.963748	0.685531	154	0.895	10	0.985078	0.374482	0.985078	0.943233	0.962498	0.793872
CML496	0.00799635	0.961759	0.679254	202	0.871056	2	0.9776	0.0720696	0.9776	0.960816	0.962415	0.709712
CML50	0.00839552	0.954609	0.699021	180	0.85831	10	0.946218	0.202978	0.946218	0.944046	0.942645	0.745069
CML69	0.00891993	0.943019	0.676161	247	0.8499	2	0.969923	0.061932	0.969923	0.943899	0.946045	0.695454
D863F	0.00856236	0.994847	0.922613	25	0.978415	14	0.980115	0.920265	0.980115	0.987115	0.978801	0.985042
DAN3130	0.00888813	0.982987	0.858999	96	0.936375	9	0.979667	0.547431	0.979667	0.960441	0.971169	0.898398
DAN340	0.00859025	0.993952	0.90183	35	0.976553	14	0.987297	0.826475	0.987297	0.985215	0.985924	0.981678
DAN360	0.0559768	0.974996	0.679852	8	0.982739	6	0.986052	0.981734	0.986052	0.941905	0.98405	0.994897
DAN4245	0.0108322	0.989842	0.782561	45	0.957564	17	0.970141	0.802666	0.970141	0.976376	0.969664	0.936736
DAN599	0.00891961	0.993673	0.930143	13	0.983699	10	0.98473	0.986193	0.98473	0.966667	0.983065	0.996862
DH3732	0.0154097	0.974942	0.797067	112	0.890044	12	0.963523	0.436064	0.963523	0.966521	0.9632	0.856109
DONG237	0.00788548	0.967112	0.736016	129	0.911855	9	0.943441	0.463869	0.943441	0.96193	0.948905	0.851176
DONG46	0.00864083	0.961152	0.703424	197	0.881521	9	0.979839	0.254772	0.979839	0.945727	0.956663	0.755647
EN25	0.128988	0.930787	0.606134	134	0.831363	12	0.90852	0.244466	0.90852	0.911236	0.906203	0.683183
ES40	0.00779009	0.972044	0.711846	158	0.878123	7	0.965321	0.249681	0.965321	0.961255	0.961497	0.750895
FCD0602	0.0331781	0.993882	0.923855	5	0.982141	5	0.982141	1	0.982141	-	0.982141	1
GEMS1	0.135395	0.944934	0.563157	68	0.857103	12	0.901433	0.428579	0.901433	0.954497	0.915277	0.725178
GEMS10	0.0591589	0.970718	0.752588	24	0.902519	19	0.904319	0.928201	0.904319	0.949243	0.89718	0.972432
GEMS11	0.075412	0.990782	0.799517	32	0.953478	12	0.964744	0.844064	0.964744	0.97299	0.962415	0.943995
GEMS13	0.100826	0.963278	0.620709	20	0.896264	16	0.900706	0.94798	0.900706	0.946375	0.892403	0.975153
GEMS14	0.0757942	0.987579	0.817771	33	0.950057	11	0.96458	0.884445	0.96458	0.934523	0.959206	0.964112
GEMS15	0.104643	0.980229	0.804529	54	0.928924	10	0.955025	0.845147	0.955025	0.903188	0.945672	0.944367
GEMS16	0.0863994	0.99455	0.77975	26	0.963028	16	0.968748	0.88861	0.968748	0.981929	0.967005	0.973042
GEMS17	0.103466	0.978027	0.79385	18	0.962927	15	0.968861	0.954561	0.968861	0.987635	0.966429	0.987447
GEMS18	0.0602217	0.977082	0.737653	32	0.938068	16	0.942894	0.877525	0.942894	0.968945	0.939969	0.959145
GEMS19	0.0698685	0.989135	0.786151	20	0.945327	16	0.945961	0.980188	0.945961	0.978659	0.941164	0.992944
GEMS2	0.106682	0.962229	0.668371	180	0.869871	9	0.907318	0.28137	0.907318	0.956241	0.934622	0.774116
GEMS20	0.0493846	0.988518	0.84307	19	0.954189	12	0.956278	0.971868	0.956278	0.960546	0.952387	0.992809
GEMS21	0.0559798	0.992769	0.907633	11	0.964405	11	0.964405	1	0.964405	-	0.964405	1
GEMS23	0.0299612	0.993695	0.874002	14	0.97592	10	0.976536	0.972342	0.976536	0.932692	0.97354	0.991883
GEMS25	0.0533508	0.973248	0.678735	58	0.896581	17	0.935256	0.689967	0.935256	0.947034	0.932296	0.878778
GEMS28	0.225774	0.913088	0.639979	20	0.797428	13	0.793261	0.952157	0.793261	0.833736	0.775305	0.981712
GEMS29	0.0491859	0.988626	0.760908	27	0.956187	18	0.960201	0.883858	0.960201	0.974198	0.957579	0.957418
GEMS3	0.0509719	0.977638	0.834084	79	0.926542	13	0.973159	0.661587	0.973159	0.96088	0.967963	0.901198
GEMS30	0.0582277	0.978831	0.746018	70	0.920209	13	0.950606	0.621894	0.950606	0.96961	0.952602	0.889965
GEMS31	0.200812	0.943891	0.497985	49	0.94159	14	0.971854	0.602432	0.971854	0.932233	0.960283	0.798569
GEMS32	0.0580881	0.987623	0.738273	37	0.955103	17	0.970683	0.771305	0.970683	0.960849	0.966591	0.923561
GEMS33	0.128586	0.981284	0.710435	38	0.929353	15	0.936785	0.847191	0.936785	0.969346	0.934317	0.943148
GEMS35	0.086009	0.946174	0.602838	152	0.862973	10	0.883759	0.452862	0.883759	0.931692	0.898455	0.811111
GEMS36	0.260368	0.956945	0.489902	21	0.868053	12	0.872065	0.918414	0.872065	0.928986	0.862046	0.957316
GEMS37	0.169497	0.944989	0.581897	62	0.853727	18	0.850017	0.765638	0.850017	0.948848	0.85204	0.9077
GEMS39	0.12861	0.960471	0.560019	55	0.860263	15	0.876479	0.796864	0.876479	0.94653	0.874847	0.917669
GEMS4	0.0657122	0.99237	0.916517	11	0.97881	9	0.986403	0.960646	0.986403	0.920763	0.983648	0.982299
GEMS40	0.21611	0.953145	0.521387	32	0.861968	19	0.868009	0.857091	0.868009	0.93498	0.86842	0.89509
GEMS41	0.127924	0.960662	0.593592	85	0.87547	12	0.877367	0.561543	0.877367	0.93991	0.888874	0.829444
GEMS42	0.254475	0.963226	0.535532	23	0.857644	12	0.862247	0.906876	0.862247	0.908987	0.852102	0.958196
GEMS44	0.129603	0.941928	0.585995	85	0.833362	10	0.874548	0.427349	0.874548	0.927448	0.888505	0.735462
GEMS46	0.141529	0.941713	0.562073	112	0.831013	8	0.848409	0.264967	0.848409	0.93945	0.895297	0.66801
GEMS48	0.144039	0.982932	0.765909	60	0.924679	16	0.96652	0.624807	0.96652	0.957438	0.961664	0.857735
GEMS49	0.0934154	0.980945	0.725426	32	0.937154	18	0.940618	0.854167	0.940618	0.970977	0.941764	0.9253
GEMS5	0.0913547	0.992567	0.762308	28	0.946704	17	0.953712	0.915795	0.953712	0.960483	0.949832	0.969915
GEMS50	0.121453	0.970061	0.677312	49	0.886556	13	0.928085	0.633567	0.928085	0.932036	0.922879	0.812556
GEMS51	0.148595	0.967925	0.661643	76	0.862962	13	0.877981	0.572324	0.877981	0.937094	0.886539	0.8323
GEMS54	0.245835	0.953971	0.523769	56	0.86207	19	0.873003	0.681986	0.873003	0.924983	0.872035	0.84298
GEMS55	0.153804	0.968191	0.737415	132	0.887053	14	0.931757	0.542261	0.931757	0.947062	0.933012	0.84342
GEMS56	0.0836499	0.969032	0.689798	76	0.895271	13	0.945047	0.539055	0.945047	0.942055	0.939861	0.808345
GEMS58	0.150064	0.942851	0.616554	51	0.831713	18	0.858098	0.655061	0.858098	0.920955	0.859445	0.835055
GEMS59	0.136601	0.976603	0.789989	68	0.921134	15	0.949992	0.623734	0.949992	0.957306	0.94851	0.877118
GEMS6	0.131639	0.995136	0.895677	15	0.967205	10	0.972119	0.974611	0.972119	0.90491	0.96836	0.990596
GEMS60	0.185519	0.962265	0.587259	64	0.877716	15	0.921167	0.53472	0.921167	0.946994	0.92377	0.804732
GEMS61	0.195406	0.961392	0.592339	92	0.888554	15	0.942611	0.558856	0.942611	0.935277	0.935712	0.827017
GEMS62	0.134937	0.960389	0.67475	99	0.883203	14	0.906913	0.611226	0.906913	0.939732	0.910068	0.869803
GEMS63	0.122103	0.982065	0.840756	24	0.907046	10	0.927383	0.883948	0.927383	0.893317	0.918307	0.945722
GEMS64	0.0915407	0.952695	0.698874	23	0.880956	11	0.896371	0.901457	0.896371	0.901945	0.8866	0.950667
GEMS65	0.185609	0.986828	0.622729	15	0.934704	13	0.933686	0.983292	0.933686	0.993169	0.927863	0.993893
GEMS66	0.139183	0.989574	0.72572	45	0.921496	12	0.94378	0.672085	0.94378	0.974661	0.945923	0.862973
GEMS9	0.115612	0.994224	0.859936	14	0.966573	9	0.972608	0.956966	0.972608	0.957572	0.969655	0.979996
GY1007	0.00841544	0.992538	0.791456	51	0.967905	15	0.985696	0.808176	0.985696	0.975472	0.982956	0.955916
GY1032	0.00811823	0.992162	0.785055	48	0.969711	11	0.985363	0.713404	0.985363	0.978043	0.9823	0.918673
GY386	0.00797424	0.976411	0.771813	98	0.940473	15	0.966377	0.595286	0.966377	0.963947	0.963589	0.905239
GY462	0.0082829	0.980277	0.757623	126	0.939569	8	0.971085	0.445479	0.971085	0.97407	0.970792	0.858559
GY798	0.00786879	0.980996	0.795453	94	0.942911	11	0.984166	0.472686	0.984166	0.970033	0.976868	0.85594
GY923	0.00796428	0.976477	0.755986	120	0.926576	10	0.983995	0.305415	0.983995	0.969098	0.974055	0.79359
HTH-17	0.00849842	0.97856	0.82669	101	0.942098	9	0.985414	0.579718	0.985414	0.952035	0.973131	0.882345
HUA83-2	0.0122924	0.948022	0.691299	256	0.835856	1	0.980903	0.0260101	0.980903	0.945437	0.946705	0.685598
HYS	0.00796608	0.980474	0.83028	67	0.950712	11	0.984648	0.71915	0.984648	0.937504	0.973177	0.917793
HZS	0.00806191	0.996721	0.872896	23	0.984636	12	0.98607	0.953873	0.98607	0.952897	0.983605	0.994389
IRF314	0.0133194	0.984615	0.760061	71	0.941963	17	0.976928	0.685023	0.976928	0.953128	0.969663	0.884975
J4112	0.00719195	0.995978	0.876723	8	0.983495	6	0.983521	0.976902	0.983521	0.986478	0.982028	0.997212
JH59	0.0090525	0.99456	0.884783	34	0.973787	20	0.972854	0.852937	0.972854	0.990703	0.972806	0.967928
JH96C	0.132232	0.983936	0.745002	27	0.934501	11	0.952327	0.812003	0.952327	0.948866	0.947696	0.919226
JI63	0.00808452	0.990255	0.738996	46	0.969203	17	0.983128	0.825019	0.983128	0.969503	0.979929	0.956684
JI842	0.00873502	0.99552	0.891726	23	0.987209	16	0.98813	0.913932	0.98813	0.993299	0.987405	0.980955
JI846	0.00870107	0.994662	0.819724	36	0.972827	19	0.98688	0.825154	0.98688	0.990993	0.986371	0.965455
JI853	0.00805808	0.992517	0.792495	40	0.979251	16	0.985277	0.891738	0.985277	0.970078	0.982712	0.982231
JIAO51	0.00815891	0.947887	0.660921	263	0.831002	1	0.982922	0.0297468	0.982922	0.950834	0.952105	0.652296
JY01	0.0108188	0.991024	0.877795	40	0.974193	17	0.981568	0.769872	0.981568	0.978086	0.979375	0.961301
K10	0.00834725	0.990091	0.728237	12	0.980718	6	0.985559	0.97171	0.985559	0.886048	0.981944	0.994197
K12	0.00797394	0.992472	0.893228	36	0.9718	13	0.981725	0.796886	0.981725	0.988249	0.981402	0.972082
K14	0.0112372	0.994373	0.912577	46	0.975096	15	0.986836	0.81986	0.986836	0.976305	0.984165	0.976575
K22	0.00783752	0.992849	0.893115	32	0.973166	10	0.984417	0.840338	0.984417	0.980093	0.982463	0.965038
L3180	0.00673862	0.996496	0.896637	1	0.989569	1	0.989569	1	0.989569	-	0.989569	1
LG001	0.00916684	0.993472	0.86444	52	0.966088	16	0.983197	0.74306	0.983197	0.980793	0.981392	0.94851
LIAO138	0.244343	0.954785	0.561328	40	0.856775	17	0.854655	0.748208	0.854655	0.94673	0.855243	0.881148
LIAO159	0.00675828	0.996759	0.896163	1	0.989569	1	0.989569	1	0.989569	-	0.989569	1
LIAO5114	0.00702268	0.997621	0.932536	17	0.987142	11	0.987392	0.967894	0.987392	0.996855	0.986486	0.995484
LIAO5262	0.0162166	0.993712	0.818618	31	0.961561	18	0.969396	0.860218	0.969396	0.988437	0.968793	0.968029
LIAO5263	0.0147567	0.985996	0.793308	73	0.94973	12	0.976438	0.70479	0.976438	0.968517	0.972981	0.933914
LK11	0.00873783	0.991808	0.927151	32	0.975841	14	0.983476	0.873822	0.983476	0.976603	0.981318	0.982603
LV28	0.00831408	0.976439	0.750127	138	0.923257	9	0.980409	0.433332	0.980409	0.967618	0.973461	0.837358
LX9801	0.00819392	0.982495	0.815401	118	0.930707	11	0.986874	0.559917	0.986874	0.952919	0.974059	0.883327
LXN	0.00982992	0.982215	0.840124	69	0.951604	16	0.978327	0.617762	0.978327	0.963608	0.971938	0.916167
LY042	0.0137684	0.987173	0.875651	50	0.959991	16	0.983749	0.765514	0.983749	0.953003	0.976557	0.947822
M153	0.008131	0.989409	0.861765	61	0.962543	14	0.979971	0.629582	0.979971	0.982828	0.979321	0.904426
M97	0.00765301	0.987659	0.864565	45	0.971834	16	0.984346	0.76802	0.984346	0.976853	0.981691	0.929262
MO113	0.00825636	0.966729	0.807622	163	0.901796	9	0.987202	0.293742	0.987202	0.956465	0.966873	0.8189
MO17	0.0087035	0.997768	0.95271	11	0.989908	10	0.989856	0.993814	0.989856	0.995633	0.988917	0.999921
NAN21-3	0.00715388	0.970957	0.776735	162	0.893724	7	0.972184	0.234983	0.972184	0.965605	0.966802	0.811551
P178	0.00868561	0.989058	0.887561	29	0.962012	16	0.976919	0.851526	0.976919	0.972273	0.974309	0.973245
Q1261	0.00904241	0.99156	0.846355	40	0.965038	15	0.979271	0.780969	0.979271	0.972654	0.976374	0.944537
QI205	0.00784373	0.973191	0.808435	119	0.923291	14	0.982598	0.449566	0.982598	0.942666	0.962866	0.84797
R15	0.00771579	0.992217	0.836432	28	0.96462	12	0.975552	0.869938	0.975552	0.953701	0.971391	0.961515
R15X1141	0.0079284	0.993632	0.871485	22	0.978235	11	0.979569	0.888498	0.979569	0.982076	0.978031	0.983924
RY713	0.0081493	0.97863	0.760434	121	0.92661	14	0.98009	0.52789	0.98009	0.951409	0.967769	0.864429
RY729	0.00787789	0.973777	0.763843	126	0.916754	9	0.983214	0.361816	0.983214	0.960659	0.969963	0.830539
S22	0.00790063	0.996249	0.89456	28	0.986521	13	0.987348	0.852124	0.987348	0.996412	0.987491	0.983518
S37	0.00792297	0.979915	0.747248	108	0.93318	13	0.980875	0.504092	0.980875	0.964071	0.972471	0.852226
SC55	0.00824613	0.971466	0.665572	126	0.922884	9	0.97689	0.617469	0.97689	0.942875	0.966135	0.88064
SHEN5003	0.00801952	0.996006	0.921676	10	0.98292	8	0.983146	0.976575	0.983146	0.997767	0.981886	0.999436
SI273	0.0784332	0.990267	0.810569	39	0.934828	17	0.945844	0.786704	0.945844	0.979479	0.946932	0.946196
SI434	0.0504368	0.940003	0.550818	111	0.885687	10	0.977858	0.434393	0.977858	0.920795	0.954049	0.748388
SI446	0.00809196	0.992593	0.894187	30	0.979996	15	0.984943	0.847202	0.984943	0.971044	0.981919	0.971743
SW92E114	0.00786399	0.946584	0.664273	238	0.848974	1	0.940816	0.00553166	0.940816	0.946422	0.946179	0.664454
SY1032	0.00842973	0.96296	0.735293	192	0.896976	4	0.981177	0.161931	0.981177	0.953797	0.959529	0.759949
SY1035	0.00818883	0.973964	0.780382	139	0.91847	9	0.974465	0.278084	0.974465	0.964037	0.966397	0.822659
SY1039	0.00774076	0.965365	0.76916	164	0.900712	6	0.977514	0.23496	0.977514	0.959706	0.964399	0.801097
SY1052	0.008173	0.971408	0.771791	120	0.929567	12	0.974554	0.353586	0.974554	0.96167	0.965818	0.833328
SY1128	0.00764211	0.976288	0.777322	131	0.917217	11	0.980266	0.403303	0.980266	0.953858	0.965386	0.847518
SY3073	0.00756201	0.978963	0.815084	125	0.929917	13	0.986089	0.329472	0.986089	0.973516	0.977829	0.842878
TIAN77	0.00816878	0.993734	0.718518	5	0.984173	3	0.984243	0.975796	0.984243	0.923529	0.98196	0.988779
TIE7922	0.00653595	0.997077	0.929929	31	0.982762	11	0.987828	0.915399	0.987828	0.993062	0.987156	0.98651
TY1	0.019241	0.995682	0.854009	17	0.978415	12	0.979351	0.962769	0.979351	0.990024	0.97776	0.995338
TY11	0.0113453	0.983741	0.80725	65	0.949684	15	0.979208	0.680326	0.979208	0.957022	0.97189	0.916765
TY2	0.0314888	0.995645	0.86566	9	0.982276	8	0.982236	0.997731	0.982236	0.989796	0.980542	0.999718
TY3	0.0257281	0.99186	0.859033	5	0.977907	4	0.978315	0.987063	0.978315	0.972222	0.976158	0.994536
TY4	0.0138564	0.995895	0.860715	6	0.980176	6	0.980176	1	0.980176	-	0.980176	1
TY5	0.0188736	0.994669	0.854495	14	0.979047	10	0.980803	0.983236	0.980803	0.990333	0.979074	0.995112
TY6	0.0118321	0.99136	0.830065	13	0.958061	8	0.965616	0.946241	0.965616	0.957198	0.962109	0.976406
U8112	0.00613772	0.998218	0.949289	13	0.989919	11	0.989639	0.95884	0.989639	0.997601	0.989002	0.998769
W138	0.0137844	0.988326	0.844131	82	0.947652	14	0.97918	0.602951	0.97918	0.963419	0.972509	0.906278
WH413	0.00792851	0.974011	0.784254	164	0.905838	8	0.985146	0.413452	0.985146	0.956929	0.970921	0.828202
WU109	0.00846043	0.945144	0.704711	242	0.829964	2	0.980219	0.0268229	0.980219	0.938017	0.939408	0.712963
XI502	0.00837003	0.995587	0.842573	21	0.986385	12	0.987304	0.949617	0.987304	0.991147	0.986246	0.982931
XUN971	0.00714769	0.99774	0.947077	17	0.98616	15	0.98789	0.985324	0.98789	0.950431	0.986311	0.997065
XZ698	0.0150464	0.988415	0.841207	53	0.965004	18	0.984927	0.75795	0.984927	0.961966	0.979371	0.935392
YE478	0.00731024	0.994663	0.946749	12	0.985561	9	0.985509	0.964428	0.985509	0.995728	0.984475	0.995721
YE515	0.00838555	0.968941	0.823258	77	0.93353	17	0.959975	0.638839	0.959975	0.945115	0.952838	0.914316
YE52106	0.00829561	0.986401	0.818483	94	0.931746	12	0.964493	0.59804	0.964493	0.968055	0.96369	0.904088
YE8001	0.0110712	0.99466	0.927264	29	0.982694	19	0.984862	0.9098	0.984862	0.981041	0.983207	0.982366
YU374	0.008308	0.98834	0.886725	69	0.95394	14	0.990026	0.716463	0.990026	0.959325	0.982331	0.931656
Z2018F	0.0184039	0.993171	0.863233	34	0.978291	16	0.98383	0.859417	0.98383	0.97926	0.9819	0.97329
ZAC546	0.00813852	0.9864	0.863221	87	0.937797	10	0.975021	0.617345	0.975021	0.966466	0.970866	0.900814
ZB648	0.0284104	0.98074	0.858728	71	0.94045	14	0.983095	0.67913	0.983095	0.946346	0.972171	0.923516
ZH68	0.00635657	0.996788	0.935031	21	0.987661	11	0.991383	0.88957	0.991383	0.994069	0.990914	0.991544
ZHENG28	0.138755	0.968684	0.625428	47	0.920649	18	0.947302	0.68894	0.947302	0.928529	0.939619	0.84771
ZHENG29	0.00902236	0.997497	0.922365	3	0.989321	3	0.989321	1	0.989321	-	0.989321	1
ZHENG30	0.00850646	0.996679	0.934252	1	0.989106	1	0.989106	1	0.989106	-	0.989106	1
ZHENG32	0.00507454	0.995427	0.944593	14	0.982276	9	0.983183	0.979397	0.983183	0.950034	0.98099	0.998058
ZHENG35	0.0106093	0.9972	0.92267	3	0.989388	2	0.989647	0.996613	0.989647	0.995283	0.988669	0.999853
ZHENG653	0.00827993	0.992919	0.923347	14	0.979081	8	0.98206	0.934478	0.98206	0.98919	0.980868	0.996387
ZHI41	0.00828373	0.982758	0.826509	97	0.930199	12	0.980591	0.429833	0.980591	0.970538	0.974369	0.86785
ZHONG69	0.00836939	0.994996	0.805286	1	0.987717	1	0.987717	1	0.987717	-	0.987717	1
ZONG31	0.00838126	0.988073	0.817681	71	0.951276	15	0.980298	0.631422	0.980298	0.972048	0.976307	0.905871
ZZ01	0.149013	0.984087	0.788149	44	0.934297	17	0.946235	0.756946	0.946235	0.971641	0.946528	0.934851
ZZ03	0.113217	0.957116	0.531773	19	0.964541	11	0.970199	0.9281	0.970199	0.979942	0.967637	0.970434
